# Supplementary material for: Health Risk Assessment of PAHs from Estuarine Sediments in the South of Italy
Source: MDPI journal article supplement (doi:10.3390/toxics11020172), 2023-02-13
Supplement: s1 [file s1]

## Supplementary Materials

# Health Risk Assessment of PAHs from Estuarine Sediments in the South of Italy

Fabiana Di Duca <sup>1</sup>, Paolo Montuori <sup>1,\*</sup>, Ugo Trama <sup>2</sup>, Armando Masucci <sup>1</sup>, Gennaro Maria Borrelli <sup>1</sup>  
and Maria Triassi <sup>1</sup>

<sup>1</sup> Department of Public Health, University "Federico II", Via Sergio Pansini n° 5,  
80131 Naples, Italy

<sup>2</sup> General Directorate of Health, Campania Region, Centro Direzionale Is. C3, 80143 Naples, Italy

\* Correspondence: pmontuor@unina.it

**Table S1.** PAH levels (ng g<sup>-1</sup> dw) with SD (Standard Deviation) detected in sediment samples from Sele River

| Sampling Location |         | Concentration (ng g <sup>-1</sup> dry weight) |         |         |         |         |         |         |         |          |         |          |          |          |         |        |
|-------------------|---------|-----------------------------------------------|---------|---------|---------|---------|---------|---------|---------|----------|---------|----------|----------|----------|---------|--------|
| ID                | NaP     | Acy                                           | Ace     | Flu     | Phe     | Ant     | Fla     | Pyr     | BaA     | BbF      | Chr     | BkF      | BaP      | DahA     | BghiP   | IcdP   |
| 1                 | 47.65 ± | 19.01 ±                                       | 30.38 ± | 37.23 ± | 51.03 ± | 31.08 ± | 74.63 ± | 55.25 ± | 42.12 ± | 78.34 ±  | 36.26 ± | 39.12 ±  | 101.67 ± | 70.65 ±  | 55.35 ± | 75.13  |
|                   | 3.34    | 3.17                                          | 4.52    | 3.15    | 4.71    | 4.07    | 7.24    | 5.58    | 5.89    | 8.04     | 3.38    | 5.61     | 6.87     | 6.95     | 4.51    | ± 6.38 |
| 2                 | 5.08 ±  | 23.25 ±                                       | 16.27 ± | 24.31 ± | 27.14 ± | 27.55 ± | 36.02 ± | 17.32 ± | 21.42 ± | 84.28 ±  | 26.43 ± | 84.23 ±  | 86.56 ±  | 104.23 ± | 65.56 ± | 12.45  |
|                   | 1.28    | 4.05                                          | 2.10    | 2.63    | 2.36    | 3.56    | 6.39    | 3.27    | 4.39    | 7.43     | 2.91    | 5.32     | 5.19     | 8.87     | 5.45    | ± 1.98 |
| 3                 | 70.64 ± | 11.26 ±                                       | 14.16 ± | 13.17 ± | 12.11 ± | 6.58    | 2.43    | 9.23    | 27.68 ± | 78.64 ±  | 24.79 ± | 84.77 ±  | 146.46 ± | 115.68 ± | 46.12 ± | 30.89  |
|                   | 5.07    | 2.88                                          | 1.85    | 1.82    | 2.25    | ± 1.78  | ± 0.78  | ± 2.15  | 3.69    | 5.27     | 3.47    | 5.04     | 9.34     | 9.10     | 3.28    | ± 4.34 |
| 4                 | 62.10 ± | 10.25 ±                                       | 13.21 ± | 13.88 ± | 13.73 ± | 12.12 ± | 55.24 ± | 40.20 ± | 43.12 ± | 112.21 ± | 31.11 ± | 98.68 ±  | 106.62 ± | 87.69 ±  | 72.46 ± | 49.75  |
|                   | 4.16    | 2.16                                          | 1.57    | 1.74    | 3.19    | 2.50    | 6.11    | 3.98    | 5.12    | 9.56     | 4.60    | 6.27     | 8.06     | 6.24     | 6.80    | ± 6.28 |
| 5                 | 5.25    | 19.48 ±                                       | 19.45 ± | 23.79 ± | 28.07 ± | 19.09 ± | 0.70    | 9.44    | 17.33 ± | 66.63 ±  | 23.12 ± | 67.10 ±  | 81.00 ±  | 63.12 ±  | 46.23 ± | 10.63  |
|                   | ± 0.95  | 3.07                                          | 2.96    | 3.41    | 3.56    | 3.22    | ± 0.36  | ± 1.66  | 2.28    | 4.10     | 3.45    | 3.84     | 7.36     | 6.32     | 3.57    | ± 2.25 |
| 6                 | 4.32    | 10.64 ±                                       | 12.07 ± | 13.35 ± | 14.56 ± | 17.25 ± | 38.21 ± | 8.47    | 18.26 ± | 92.47 ±  | 23.10 ± | 106.48 ± | 154.99 ± | 126.58 ± | 3.69    | 14.35  |
|                   | ± 1.97  | 2.04                                          | 1.83    | 2.47    | 2.05    | 2.16    | 4.59    | ± 2.14  | 3.84    | 5.63     | 2.71    | 7.80     | 8.75     | 7.82     | ± 1.03  | ± 3.69 |
| 7                 | 4.21    | 7.31                                          | 13.02 ± | 14.04 ± | 14.20 ± | 12.75 ± | 38.21 ± | 12.11 ± | 14.95 ± | 95.85 ±  | 14.48 ± | 87.81 ±  | 96.45 ±  | 143.36 ± | 17.12 ± | 14.33  |
|                   | ± 1.18  | ± 1.85                                        | 2.24    | 3.06    | 1.97    | 1.90    | 4.25    | 3.18    | 3.67    | 7.14     | 2.96    | 6.65     | 6.30     | 6.41     | 3.22    | ± 2.47 |
| 8                 | 4.50    | 14.34 ±                                       | 9.07    | 12.26 ± | 15.24 ± | 13.69 ± | 13.12 ± | 5.05    | 16.25 ± | 53.86 ±  | 23.35 ± | 84.37 ±  | 44.04 ±  | 71.20 ±  | 8.13    | 3.79   |
|                   | ± 1.75  | 2.79                                          | ± 1.40  | 2.45    | 3.12    | 2.39    | 3.12    | ± 1.64  | 4.17    | 6.80     | 3.64    | 5.47     | 3.27     | 7.80     | ± 2.56  | ± 1.10 |
| 9                 | 3.53    | 8.46                                          | 5.19    | 6.96    | 33.09 ± | 6.09    | 45.85 ± | 6.64    | 13.82 ± | 91.02 ±  | 11.43 ± | 87.76 ±  | 126.46 ± | 95.34 ±  | 7.79    | 2.65   |
|                   | ± 0.84  | ± 1.73                                        | ± 1.17  | ± 1.83  | 4.18    | ± 2.47  | 5.61    | ± 2.27  | 2.52    | 7.93     | 2.88    | 7.05     | 8.18     | 8.63     | ± 1.36  | ± 0.97 |
| 10                | 2.23    | 12.60 ±                                       | 14.14 ± | 5.45    | 16.08 ± | 10.54 ± | 70.07 ± | 69.19 ± | 48.87 ± | 76.00 ±  | 33.23 ± | 76.20 ±  | 98.34 ±  | 85.90 ±  | 10.56 ± | 3.01   |
|                   | ± 0.96  | 3.14                                          | 2.89    | ± 1.79  | 1.75    | 3.04    | 6.50    | 7.22    | 6.81    | 4.55     | 4.27    | 5.10     | 7.44     | 8.46     | 2.20    | ± 1.34 |

**Table S2.** PAH concentrations (ng g<sup>-1</sup> dw) with SD (Standard Deviation) found in sediment samples from the Sarno River (April 2008) [39].

| Sampling Location | Concentration (ng g <sup>-1</sup> dry weight) |                 |                  |                 |                 |                 |                 |                 |                 |                 |                 |                 |                 |                 |                 |                 |
|-------------------|-----------------------------------------------|-----------------|------------------|-----------------|-----------------|-----------------|-----------------|-----------------|-----------------|-----------------|-----------------|-----------------|-----------------|-----------------|-----------------|-----------------|
| ID                | NaP                                           | Acy             | Ace              | Flu             | Phe             | Ant             | Fla             | Pyr             | BaA             | BbF             | Chr             | BkF             | BaP             | DahA            | BghiP           | IcdP            |
| 1                 | 0.68<br>± 0.35                                | 0.28<br>± 0.11  | 0.20<br>± 0.12   | 0.24<br>± 0.08  | 0.59<br>± 0.21  | 0.36<br>± 0.15  | 0.37<br>± 0.15  | 0.18<br>± 0.07  | 0.22<br>± 0.10  | 0.23<br>± 0.12  | 0.18<br>± 0.05  | 0.30<br>± 0.14  | 0.20<br>± 0.12  | 0.39<br>± 0.14  | 0.71<br>± 0.39  | 0.48<br>± 0.21  |
| 2                 | 8.41<br>± 2.36                                | 6.26<br>± 1.19  | 6.19<br>± 1.31   | 7.27<br>± 1.48  | 7.44<br>± 1.35  | 7.16<br>± 1.35  | 7.08<br>± 1.63  | 4.34<br>± 1.22  | 1.39<br>± 0.48  | 7.33<br>± 1.17  | 1.15<br>± 0.48  | 7.26<br>± 1.57  | 7.05<br>± 1.87  | 7.65<br>± 1.25  | 7.59<br>± 1.12  | 7.69<br>± 1.45  |
| 3                 | 14.02 ±<br>3.19                               | 11.36 ±<br>2.30 | 15.14<br>± 2.06  | 12.14<br>± 2.62 | 12.01<br>± 2.25 | 14.28<br>± 2.18 | 14.38<br>± 2.71 | 14.39<br>± 3.41 | 7.26<br>± 1.07  | 13.04<br>± 2.35 | 4.25<br>± 1.25  | 14.49<br>± 2.69 | 14.26<br>± 2.73 | 14.89<br>± 2.48 | 15.02<br>± 2.28 | 14.22<br>± 2.09 |
| 4                 | 22.27 ±<br>4.93                               | 22.10 ±<br>3.64 | 23.20<br>± 3.48  | 22.29<br>± 3.19 | 22.71<br>± 2.56 | 23.25<br>± 3.38 | 24.04<br>± 3.68 | 23.31<br>± 4.64 | 17.75<br>± 2.30 | 22.09<br>± 3.48 | 9.02<br>± 2.32  | 25.13<br>± 3.87 | 21.71<br>± 3.70 | 27.85<br>± 3.04 | 22.31<br>± 3.45 | 23.32<br>± 2.37 |
| 5                 | 15.37 ±<br>3.25                               | 1.77<br>± 0.63  | 200.68 ±<br>8.92 | 14.55<br>± 2.37 | 20.81<br>± 3.69 | 15.90<br>± 1.69 | 17.70<br>± 2.06 | 17.67<br>± 2.31 | 15.78<br>± 1.87 | 20.21<br>± 2.56 | 9.15<br>± 1.78  | 17.44<br>± 3.15 | 20.49<br>± 2.97 | 20.27<br>± 3.33 | 19.44<br>± 2.64 | 19.37<br>± 2.18 |
| 6                 | 21.67 ±<br>4.89                               | 18.35 ±<br>3.88 | 205.84<br>± 9.13 | 19.18<br>± 2.91 | 20.51<br>± 2.86 | 20.26<br>± 3.24 | 21.17<br>± 3.55 | 21.06<br>± 2.68 | 20.07<br>± 2.49 | 21.14<br>± 3.69 | 5.90<br>± 1.36  | 23.21<br>± 2.78 | 21.31<br>± 3.46 | 22.47<br>± 4.16 | 20.57<br>± 3.81 | 19.02<br>± 2.60 |
| 7                 | 13.41 ±<br>2.37                               | 5.44<br>± 1.27  | 3.65<br>± 1.02   | 9.44<br>± 1.40  | 18.86<br>± 3.04 | 6.47<br>± 1.15  | 3.53<br>± 1.27  | 2.75<br>± 1.15  | 12.49<br>± 2.05 | 15.11<br>± 1.44 | 5.82<br>± 0.98  | 22.54<br>± 2.39 | 9.60<br>± 2.05  | 17.09<br>± 1.98 | 17.02<br>± 2.66 | 17.21<br>± 1.78 |
| 8                 | 26.46 ±<br>4.65                               | 27.32 ±<br>4.03 | 276.58<br>± 7.57 | 24.91<br>± 3.85 | 25.47<br>± 3.97 | 27.55<br>± 3.60 | 25.32<br>± 3.58 | 25.78<br>± 3.47 | 20.98<br>± 2.31 | 27.20<br>± 3.61 | 14.59<br>± 1.17 | 25.39<br>± 3.97 | 25.92<br>± 4.23 | 23.48<br>± 3.11 | 26.17<br>± 4.03 | 28.21<br>± 2.27 |
| 9                 | 26.83 ±<br>5.68                               | 26.24 ±<br>3.85 | 274.99 ±<br>9.36 | 26.54<br>± 4.23 | 27.73<br>± 4.32 | 28.17<br>± 3.54 | 31.02<br>± 4.82 | 28.27<br>± 4.56 | 27.67<br>± 3.82 | 29.02<br>± 2.87 | 6.12<br>± 1.78  | 29.36<br>± 4.02 | 30.52<br>± 4.51 | 29.03<br>± 2.18 | 29.04<br>± 3.28 | 28.61<br>± 3.15 |
| 10                | 11.31 ±<br>2.66                               | 2.33<br>± 0.72  | 1.74<br>± 0.50   | 10.74<br>± 1.47 | 10.47<br>± 1.23 | 13.29<br>± 1.02 | 13.46<br>± 2.30 | 9.11<br>± 1.38  | 21.30<br>± 3.02 | 10.55<br>± 1.94 | 2.88<br>± 0.45  | 11.04<br>± 2.32 | 11.21<br>± 2.33 | 11.16<br>± 1.25 | 11.04<br>± 1.59 | 10.29<br>± 1.77 |
| 11                | 4.12<br>± 3.07                                | 2.12<br>± 0.58  | 1.45<br>± 0.71   | 3.58<br>± 1.09  | 8.65<br>± 1.17  | 2.25<br>± 0.63  | 2.46<br>± 1.01  | 0.96<br>± 0.32  | 8.04<br>± 1.25  | 1.99<br>± 0.58  | 1.45<br>± 0.69  | 1.73<br>± 0.86  | 3.45<br>± 1.31  | 7.37<br>± 1.06  | 6.07<br>± 1.23  | 10.81<br>± 2.05 |
| 12                | 2.08<br>± 0.95                                | 2.66<br>± 1.01  | 1.86<br>± 0.66   | 2.59<br>± 0.97  | 9.18<br>± 2.03  | 2.85<br>± 0.96  | 3.32<br>± 1.23  | 2.18<br>± 0.59  | 24.19<br>± 4.11 | 3.25<br>± 1.20  | 3.30<br>± 0.75  | 2.32<br>± 1.28  | 2.25<br>± 0.95  | 6.39<br>± 1.25  | 7.47<br>± 1.20  | 11.38<br>± 1.54 |
| 13                | 4.02<br>± 1.54                                | 1.35<br>± 0.60  | 1.36<br>± 0.47   | 2.13<br>± 0.82  | 3.29<br>± 0.76  | 1.25<br>± 0.49  | 2.02<br>± 0.75  | 1.18<br>± 0.35  | 4.26<br>± 1.63  | 4.26<br>± 1.75  | 1.24<br>± 0.58  | 1.14<br>± 0.43  | 1.36<br>± 0.69  | 1.97<br>± 0.88  | 4.48<br>± 1.15  | 5.06<br>± 0.95  |

**Table S3.** PAH levels (ng g<sup>-1</sup> dry weight) with SD (Standard Deviation) detected in sediment samples from Volturno River [40].

| Sampling Location |                 | Concentration (ng g <sup>-1</sup> dry weight) |                 |                 |                 |                 |                 |                 |                 |                  |                 |                  |                  |                  |                 |                 |
|-------------------|-----------------|-----------------------------------------------|-----------------|-----------------|-----------------|-----------------|-----------------|-----------------|-----------------|------------------|-----------------|------------------|------------------|------------------|-----------------|-----------------|
| ID                | NaP             | Acy                                           | Ace             | Flu             | Phe             | Ant             | Fla             | Pyr             | BaA             | BbF              | Chr             | BkF              | BaP              | DahA             | BghiP           | IcdP            |
| 1                 | 50.77<br>± 4.58 | 22.05<br>± 3.75                               | 33.73<br>± 3.91 | 40.17<br>± 4.19 | 54.73<br>± 5.27 | 35.67<br>± 3.03 | 62.74<br>± 4.12 | 56.64<br>± 4.06 | 42.40<br>± 3.89 | 81.43<br>± 4.62  | 38.01<br>± 2.43 | 42.25<br>± 3.84  | 104.74<br>± 4.52 | 73.55<br>± 4.20  | 62.27<br>± 4.31 | 70.96<br>± 3.15 |
| 2                 | 8.11<br>± 2.12  | 26.62<br>± 4.18                               | 19.22<br>± 2.39 | 27.22<br>± 2.30 | 33.43<br>± 4.15 | 32.11<br>± 2.99 | 30.79<br>± 2.41 | 19.10<br>± 1.27 | 23.46<br>± 1.97 | 87.49<br>± 3.19  | 23.04<br>± 2.64 | 87.31<br>± 4.10  | 89.66<br>± 3.49  | 107.35<br>± 4.12 | 6.18<br>± 1.05  | 15.46<br>± 2.24 |
| 3                 | 73.78<br>± 8.96 | 14.47<br>± 2.33                               | 17.67<br>± 3.60 | 16.38<br>± 2.54 | 15.56<br>± 2.34 | 10.06<br>± 2.08 | 46.22<br>± 3.89 | 12.53<br>± 2.15 | 23.31<br>± 2.14 | 81.76<br>± 4.36  | 20.78<br>± 3.10 | 87.68<br>± 2.23  | 149.56<br>± 5.69 | 118.78<br>± 4.76 | 56.34<br>± 3.51 | 32.64<br>± 3.21 |
| 4                 | 65.27<br>± 5.39 | 13.63<br>± 1.89                               | 16.17<br>± 2.88 | 16.81<br>± 3.18 | 17.25<br>± 3.10 | 14.51<br>± 1.45 | 54.30<br>± 2.58 | 23.58<br>± 2.69 | 29.70<br>± 2.38 | 115.15<br>± 5.48 | 28.33<br>± 3.95 | 101.98<br>± 3.75 | 109.66<br>± 4.50 | 90.96<br>± 3.41  | 81.92<br>± 4.03 | 43.05<br>± 2.26 |
| 5                 | 8.72<br>± 1.67  | 22.59<br>± 3.96                               | 22.72<br>± 3.99 | 26.90<br>± 2.49 | 28.95<br>± 3.62 | 24.09<br>± 2.16 | 18.94<br>± 1.78 | 12.27<br>± 1.44 | 20.23<br>± 2.06 | 69.73<br>± 3.47  | 18.65<br>± 2.50 | 70.32<br>± 4.69  | 84.00<br>± 3.19  | 66.22<br>± 3.17  | 5.39<br>± 1.10  | <LOQ            |
| 6                 | 7.49<br>± 1.34  | 13.52<br>± 2.55                               | 15.11<br>± 2.48 | 16.35<br>± 1.93 | 17.41<br>± 2.13 | 18.55<br>± 2.94 | 29.38<br>± 3.12 | 11.69<br>± 1.07 | 20.15<br>± 2.28 | 95.85<br>± 3.89  | 19.32<br>± 2.32 | 109.78<br>± 3.01 | 157.86<br>± 4.58 | 129.76<br>± 4.23 | 7.01<br>± 1.43  | 17.33<br>± 1.87 |
| 7                 | 7.36<br>± 2.03  | 10.26<br>± 2.12                               | 16.22<br>± 2.92 | 17.19<br>± 2.28 | 18.49<br>± 2.52 | 15.77<br>± 1.60 | 32.30<br>± 3.25 | 14.93<br>± 2.05 | 17.63<br>± 1.49 | 98.91<br>± 4.18  | 16.03<br>± 2.14 | 90.79<br>± 4.46  | 99.51<br>± 3.92  | 146.57<br>± 5.04 | 20.99<br>± 3.21 | 17.23<br>± 2.05 |
| 8                 | 7.81<br>± 1.23  | 17.35<br>± 3.27                               | 12.18<br>± 1.35 | 15.70<br>± 1.44 | 18.92<br>± 1.66 | 17.32<br>± 2.38 | 16.23<br>± 1.30 | 8.64<br>± 1.19  | 19.00<br>± 2.14 | 56.78<br>± 2.49  | 17.88<br>± 3.09 | 87.53<br>± 5.18  | 47.04<br>± 2.15  | 74.20<br>± 4.25  | 12.15<br>± 1.48 | 6.10<br>± 1.02  |
| 9                 | 6.79<br>± 1.20  | 11.85<br>± 1.19                               | 8.20<br>± 1.32  | 9.90<br>± 1.15  | 3.65<br>± 1.45  | 9.37<br>± 1.13  | 42.55<br>± 3.68 | 9.30<br>± 1.77  | 14.45<br>± 1.78 | 94.20<br>± 4.70  | 13.95<br>± 1.49 | 90.63<br>± 4.13  | 129.61<br>± 4.26 | 98.44<br>± 4.89  | 12.18<br>± 1.27 | 5.38<br>± 0.95  |
| 10                | 5.30<br>± 1.36  | 15.76<br>± 1.87                               | 17.30<br>± 2.15 | 8.65<br>± 1.09  | 18.29<br>± 2.27 | 12.87<br>± 1.64 | 66.43<br>± 4.14 | 59.65<br>± 3.09 | 40.34<br>± 3.28 | 79.04<br>± 4.55  | 32.02<br>± 3.05 | 79.98<br>± 4.49  | 101.65<br>± 4.37 | 88.95<br>± 3.36  | 14.14<br>± 2.25 | 5.93<br>± 1.41  |
